# Supplementary material
Source: PubMed Central journal article supplement (PMC8985437)
Supplement: sj-pdf-1-jcb-10.1177_0271678X20928011.pdf [file sj-pdf-1-jcb-10.1177_0271678X20928011.pdf]

## Supplementary Material

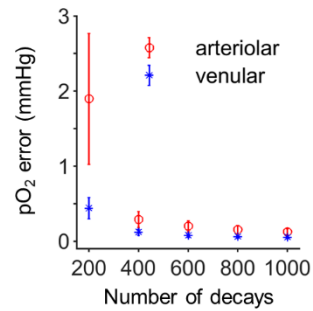

**Supplementary Figure 1.** pO<sub>2</sub> error as a function of number of decays. Although the error is higher for measurements performed in arteriole, both the venular and arteriolar pO<sub>2</sub> error dropped below 0.5 mmHg when  $\geq 400$  decays were averaged. The measurements were done in a diving arteriole and surfacing venule of an awake mouse at cortical depth of 600  $\mu\text{m}$ . Error bars are the standard deviation across repeated ( $n=3$ ) measurements.

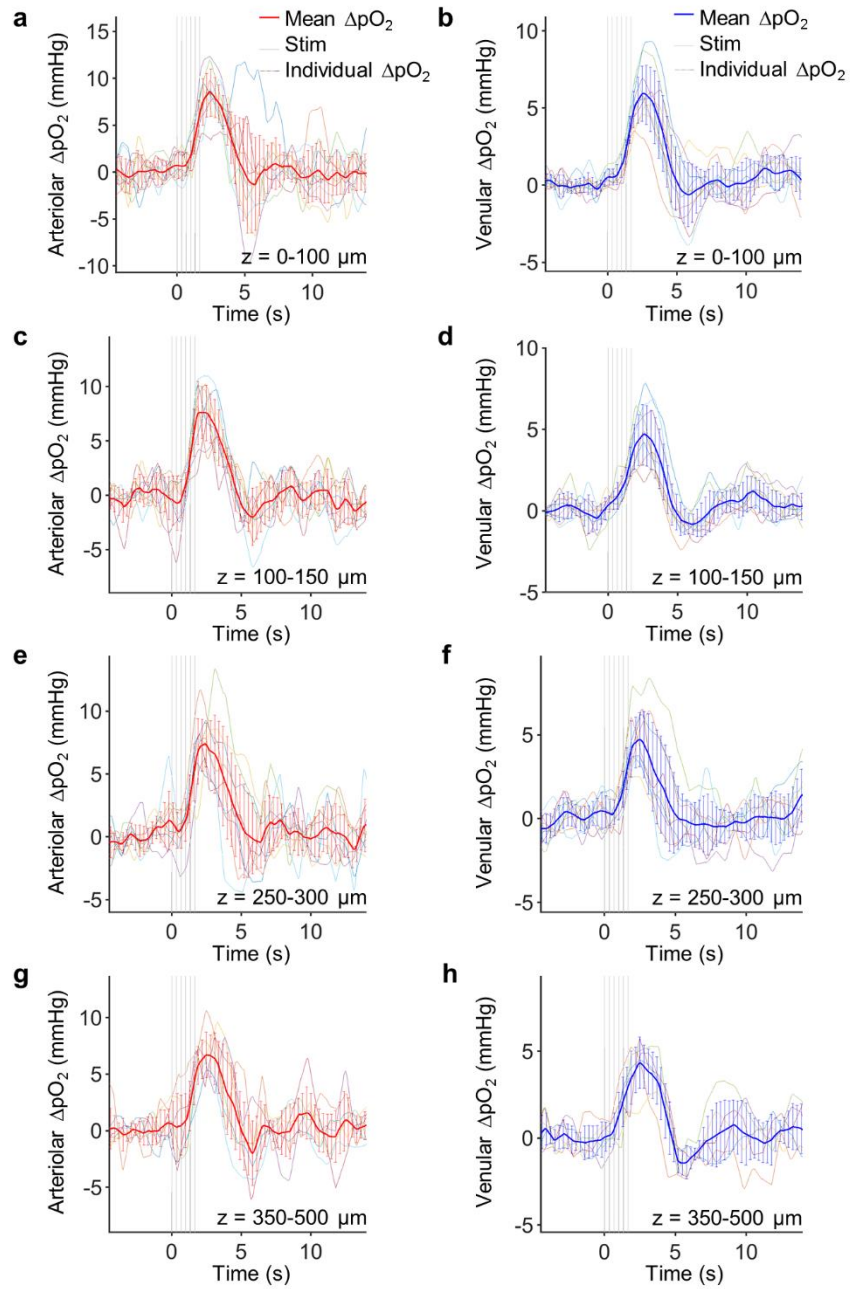

**Supplementary Fig. 2.** Intravascular  $\Delta pO_2$  transients during whisker stimulation are fairly similar across cortical depths (0-100, 100-150, 250-300, and 350-500  $\mu m$ ). (a, c, e, and g)  $\Delta pO_2$  transients in arterioles of individual animals (thin lines), the mean and standard deviation across animals (red thick line with error bars), and (b, d, f, and h)  $\Delta pO_2$  transients in venules of individual animals (thin lines), the mean and standard deviation across animals (blue thick line with error bars). Note how the response amplitude and time vary across animals. In some animals a secondary peak at  $t \geq 7$  s was observed due to voluntary whisking. Numbers of mice that were measured for each cortical depth categories were:  $n = 10$  at  $z = 0-100 \mu m$ ,  $n = 9$  at  $z = 100-150 \mu m$ ,  $n = 9$  at  $z = 250-300 \mu m$ , and  $n = 7$  at  $z = 350-500 \mu m$ .

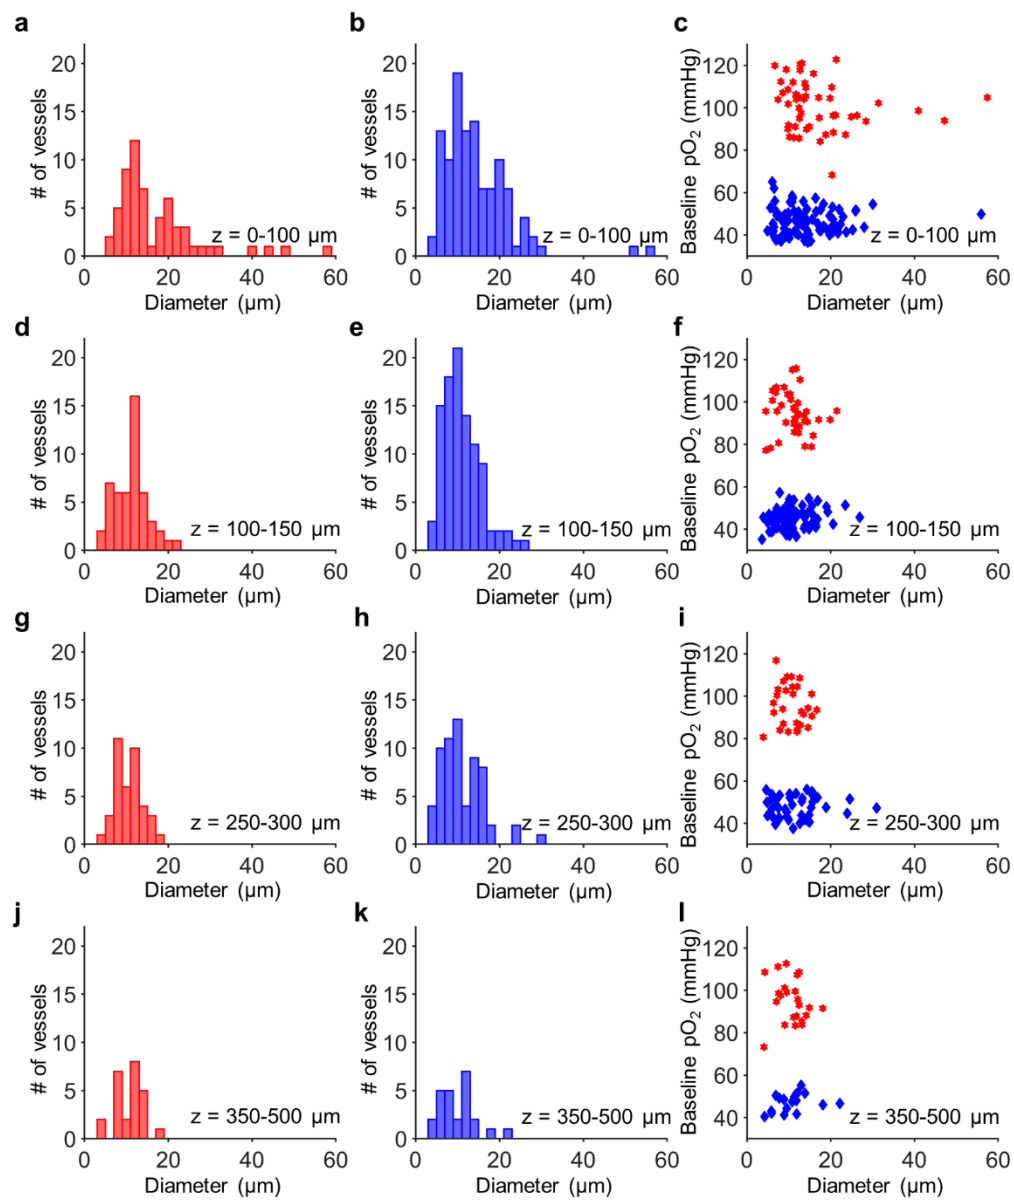

**Supplementary Fig. 3.** Baseline diameters ( $d_A$  and  $d_V$ ) of penetrating vessels across cortical depths ( $z$ ). Histograms of arteriolar (a, d, g, and j) and venular (b, e, h, and k) diameters at cortical depths of  $z = 0-100 \mu\text{m}$  ( $d_A=17.3\pm10.2 \mu\text{m}$ ,  $d_V=14.5\pm8 \mu\text{m}$ ; mean $\pm$ std),  $z = 100-150 \mu\text{m}$  ( $d_A=11.1\pm3.9 \mu\text{m}$ ,  $d_V=11\pm4.5 \mu\text{m}$ ),  $z = 250-300 \mu\text{m}$  ( $d_A=10.6\pm3.2 \mu\text{m}$ ,  $d_V=11.1\pm5.2 \mu\text{m}$ ), and  $350-500 \mu\text{m}$  ( $d_A=10.6\pm3.3 \mu\text{m}$ ,  $d_V=10.1\pm4.2 \mu\text{m}$ ). (c, f, i, and l) For vessels at each cortical depth, corresponding baseline  $pO_2$  vs. diameter values are plotted.

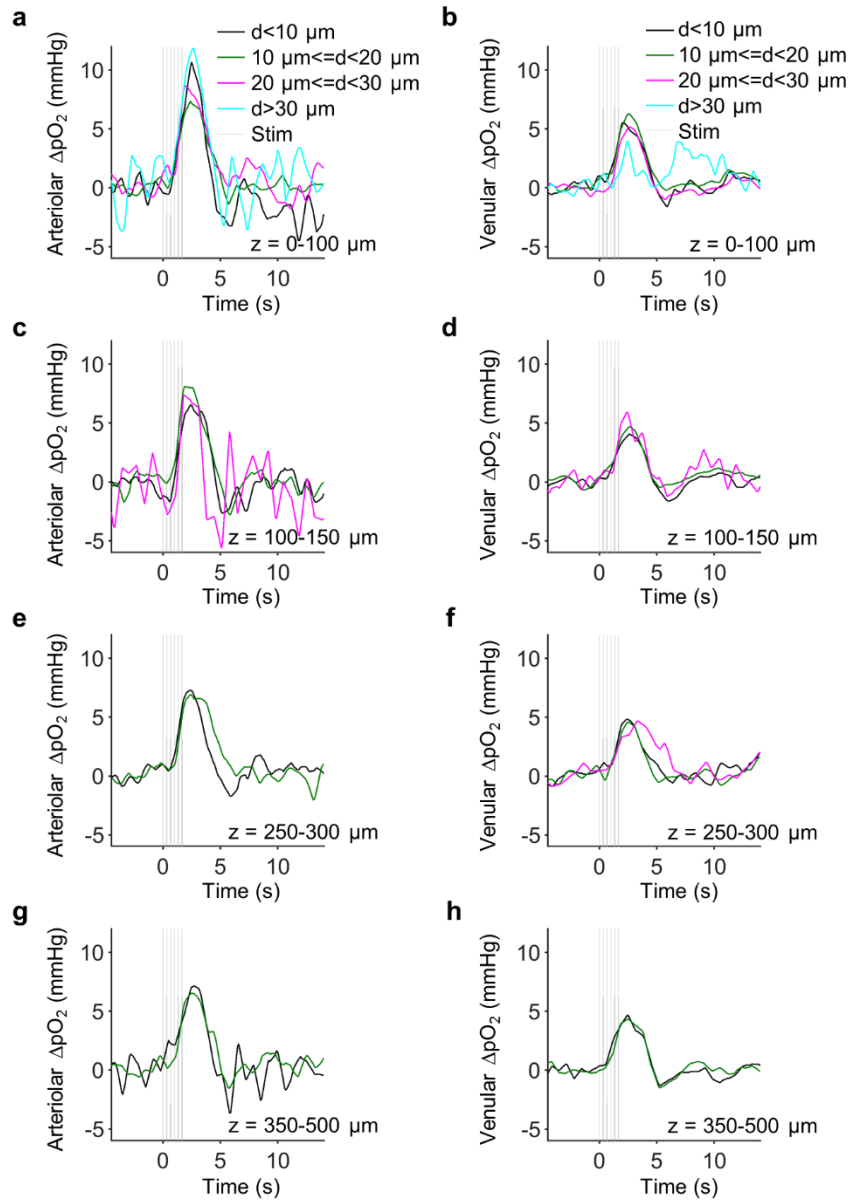

**Supplementary Fig. 4.** Intravascular  $\Delta pO_2$  transients during whisker stimulation across cortical depths did not show significant differences when grouped into diameter ranges of  $d < 10 \mu m$  (black),  $d = 10-20 \mu m$  (green),  $d = 20-30 \mu m$  (magenta), and  $d > 30 \mu m$  (cyan). Similar to Suppl. Fig. 2,  $\Delta pO_2$  responses in penetrating arterioles (a, c, e, and g) and venules (b, d, f, and h) are shown across cortical depths of 0-100, 100-150, 250-300, and 350-500  $\mu m$ .

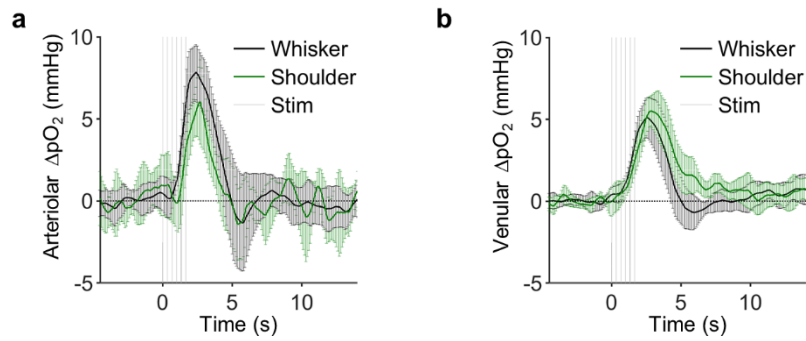

**Supplementary Fig. 5.** Mean  $\Delta pO_2$  transients during whisker and shoulder stimulation. The average (a) arteriolar and (b) venular  $\Delta pO_2$  over depths of  $z = 0, 100-150$ , and  $250-300 \mu m$  in awake mice during whisker (black,  $n=10$ ) vs. shoulder (green,  $n=5$ ) stimulation. Error bars are showing the standard deviation across animals.
